# Uveal Melanoma: a miR-16 disease?

Anaïs M. Quéméner<sup>1</sup>, Laura Bachelot<sup>1#</sup>, Marc Aubry<sup>2#</sup>, Stéphane Avner<sup>3</sup>, Delphine Leclerc<sup>2,4</sup>, Gilles Salbert<sup>3</sup>, Florian Cabillic<sup>5,6</sup>, Didier Decaudin<sup>7,8</sup>, Bernard Mari<sup>9</sup>, Frédéric Mouriaux<sup>2,4</sup>, Marie-Dominique Galibert<sup>1,10</sup> and David Gilot<sup>1,2,\*</sup>.

<sup>1</sup> Univ Rennes, CNRS, IGDR (Institut de génétique et développement de Rennes) - UMR 6290, F-35000, Rennes, France.

<sup>2</sup> INSERM U1242, University of Rennes, Rennes, France.

<sup>3</sup> SPARTE, Univ Rennes, CNRS, IGDR (Institut de génétique et développement de Rennes) - UMR 6290, F-35000, Rennes, France.

<sup>4</sup> Service d'ophtalmologie, CHU de Rennes, Rennes, France.

<sup>5</sup> NSERM U1241, Université Rennes, INRAE, Institut NuMeCan (Nutrition, Metabolisms and Cancer), F-35000 Rennes, France.

<sup>6</sup> Laboratoire de Cytogénétique et Biologie Cellulaire, CHU Rennes, F-35000 Rennes, France

<sup>7</sup> Institut Curie, Laboratory of Preclinical Investigation, Translational Research Department, PSL Research University, Paris, France.

<sup>8</sup> Curie, Department of Medical Oncology, PSL Research University, Paris, France.

<sup>9</sup> FHU-OncoAge, CNRS, IPMC, Université Côte d'Azur, 06560 Valbonne, France

<sup>10</sup> CHU Rennes, Service de Génétique Moléculaire et Génomique Médicale, Rennes, France.

# equal contribution

\* Correspondence : david.gilot@univ-rennes1.fr

## **Keywords**

Uveal melanoma, Tumor suppressor, miRNA interactome, miR-16, non-canonical base pairing

31 **Abstract**

32

33 Uveal melanoma (UM), the most common primary intraocular tumor in adults, has been  
34 extensively characterized by omics technologies during the last 5 years. Despite the discovery  
35 of gene signatures, the molecular actors driving the cancer aggressiveness are not fully  
36 understood and UM is still associated to a dismal overall survival at metastatic stage. Here, we  
37 showed that microRNA-16 (miR-16) is involved in uveal melanoma by an unexpected  
38 mechanism. By defining the miR-16-interactome, we revealed that miR-16 mainly interacts via  
39 non-canonical base-pairing to a subset of RNAs, promoting their expression levels (sponge  
40 RNAs). Consequently, the canonical miR-16 activity, involved in the RNA decay of oncogenes  
41 such as *cyclin D1* and *D3*, is impaired. This miR-16 non-canonical base-pairing to sponge  
42 RNAs can explain both the derepression of miR-16 targets and the promotion of oncogenes  
43 expression observed for patients with poor overall survival in two cohorts. miR-16 activity  
44 assessment using our sponge-signature discriminates the patient's overall survival as efficiently  
45 as the current method based on copy number variations and driver mutations detection. To  
46 conclude, miRNA loss of function due to miRNA sequestration seems to promote cancer  
47 burden by two combined events – “loss of brake and an acceleration”. Our results highlight the  
48 oncogenic role of the non-canonical base-pairing between miRNAs/mRNAs in uveal  
49 melanoma.

50

51

52

53

54

55

56

57

58

59

60

61

62

63

64

65 **Main text**

66

67 Uveal melanoma (UM) is the most common primary intraocular tumor in adults and no  
68 efficient treatment is currently able to counteract UM metastases (1). In 2017, an integrated  
69 analysis of 80 primary UMs has been performed by The Cancer Genome Atlas (TCGA) in order  
70 to identify the deregulated pathways in this rare cancer and, *in fine*, to uncover druggable targets  
71 (2). Four mRNA signatures have been generated based on tumor progression. Other signatures  
72 have been published with few common genes (3–5). Unfortunately, no clear link has been made  
73 between genes forming these signatures, suggesting that molecular actors driving this cancer  
74 are not fully understood.

75 UM is currently considered as a G-protein-coupled receptor (GPCR) disease with BES (*BAP1*,  
76 *EIF1AX* and *SF3B1*) alterations and copy number variations (1,2). Monosomy 3 is clearly  
77 associated with a high risk of metastasis. Apart from *BAP1* (3p21.1), the contribution of other  
78 genes located on chr 3 to the tumor aggressiveness is not elucidated. Because one copy of  
79 *MIR16* gene is located on chr 3 (Fig. 1A), we hypothesized that tumor suppressor activity of  
80 miR-16 is decreased in UM patients with monosomy 3 (Fig. 1B and S1). Indeed, a genetic  
81 alteration in the *MIR16* locus triggers the development of prostatic cancer, pituitary cancer and  
82 chronic lymphocytic leukemia (CLL) (6,7).

83 We firstly evaluated the expression levels of miR-16-5p (miR-16) relative to chr 3 copy number  
84 (Fig. 1C & S2A). Unexpectedly, no significant difference was found between groups of patients  
85 in the TCGA cohort. However, we previously showed that miR-16 activity is not always  
86 correlated to miRNA expression (8). Sequestration of miR-16 by coding and non-coding RNAs,  
87 referred to miRNA-sponges, can dampen the miRNA activity as we demonstrated in cutaneous  
88 melanoma. Repression of the miR-16 target mRNAs is thus alleviated, promoting *in fine* tumor  
89 growth (9,10).

90 We hypothesized comparable mechanisms mediate miR-16 inactivation in UM. To test this  
91 hypothesis, we first investigated the tumor suppressor activity of miR-16 in UM cells by  
92 elevating miR-16 expression levels through transfection of a synthetic miR-16. UM cell density  
93 decreased specifically after 72h after transfection of the synthetic miR-16 (Fig. S2B & S2C),  
94 suggesting that indeed miR-16 acts as a tumor suppressor in human uveal melanoma. However,  
95 miR-16 levels reached after transfection are more important than physio-pathological levels  
96 (basal miR-16 is >3000 copies per cell; Fig. S2A) (11), suggesting that the stoichiometry  
97 between miR-16 and its target RNAs was not respected. Knowing that a sequestration  
98 mechanism would imply a ‘target shift’ characterized by a lower decay of the canonical miR-

99 16 targets (*CCND1*, *CCND3*, *WEE1* mRNAs) (12) and a miR-16 sponging by other RNAs (10),  
100 we defined the miR-16 interactome (mRNAs interacting with miR-16 - Fig. S3, 1D-E, and  
101 Table S1) by RNA-pull down and we combined the results with a transcriptomic profiling in  
102 response to synthetic miR-16 transfection in uveal melanoma cells (MP41). As expected, we  
103 identified downregulated RNAs associated with the presence of canonical miR-16 binding sites  
104 (predicted MRE-16 in 30% of target RNAs) (13). Interestingly, we identified another set of  
105 RNAs, for which the expression levels increased despite miR-16 interaction. The miR-16 base-  
106 pairing seemed non-canonical because only 4% of the sponge RNAs exhibited a predicted  
107 MRE-16 (Fig. S4 & Fig. 1D-E). We next confirmed the most interesting targets and sponges  
108 by RT-qPCR in two additional UM cell lines (Fig. 1F, H). For the majority of tested RNAs, we  
109 validated the increase of sponge RNAs in response to miR-16 in at least another cell line.  
110 Although a fraction of sponges seemed to be cell-line specific (Fig. 1H), others, like *PYGB*,  
111 were upregulated in response to miR-16 in the three models (Fig. 1H). *PYGB* up-regulation was  
112 also detected at the protein level (Fig. 1I). In addition, 50% of the tested putative sponge  
113 mRNAs were still increased after transfection of miR-16 in DROSHA knock-out cells in which  
114 almost all miRNAs including miR-16 are lost (14), suggesting that miR-16 acts directly on  
115 these sponges rather than through a competition with another miRNA involved in sponge decay  
116 (Fig. S5A, B). A direct effect of miR-16 on sponges was confirmed by luciferase assay using  
117 non-canonical sites of *PYGB*, wild-type or mutated, fused with the luciferase coding sequence  
118 (Fig. S5C, D).

119 To further challenge the miR-16 sequestration hypothesis while preserving the  
120 stoichiometry between miR-16 and its interactome, we next depleted *PYGB* mRNA and  
121 quantified candidate endogenous miR-16 targets (Fig. S5E, F) selected as a function of: (i) a  
122 miR-16-dependent mRNA decay (Fig. S6A-B), (ii) presence of a predicted MRE-16 in their  
123 3'UTR (Fig. 1E & S3C), and (iii) a decrease in MP41 cell density in response to their depletion  
124 (Fig. S6C, D). Since the depletion of only one miR-16 sponge (*PYGB*) was followed by a  
125 moderate decrease of several miR-16 target RNAs (Fig. S5E, F), it is tempting to conclude that  
126 miR-16 sequestration involves several RNAs with non-canonical MRE-16. This model of  
127 sequestration may explain why we identified 57 potential miR-16 sponges in UM (Fig. S3B).  
128 Moreover, our model predicts that miR-16 sequestration by sponges should abolish the  
129 canonical activity of miR-16, leading to a derepression of the miR-16 targets involved in cell  
130 proliferation and/or survival of UM cells (Fig. 1G & S3B). Thus, we investigated if a high level  
131 of miR-16 sponges could be associated with a loss of canonical miR-16 activity and  
132 consequently associated with a poor overall survival of patients. We demonstrated that

133 quantification of 57 miR-16 sponge candidates efficiently predicted survival in UM patients  
134 (TCGA cohort), reflecting metastasis risk (Fig. 2). Unsupervised gene expression analysis  
135 identified 2 clusters: light and dark grey (cluster 2 & 1, respectively) (Fig. 2A). These clusters  
136 are highly correlated with those defined by TCGA. Remarkably, miR-16 expression level was  
137 comparable in the two groups supporting the sponging hypothesis (Fig 2B). In accordance with  
138 our hypothesis, we showed that a high level of miR-16 sponges is associated with a dismal  
139 survival (Fig. 2C) and miR-16 targets are derepressed in cluster 1 (Fig. 2C and S7). Altogether,  
140 these results indicate that miR-16 activity (appraised using miR-16 sponges and target  
141 expression levels) is a useful marker for clinicians in contrast to miR-16 expression. Since 57  
142 RNAs are too many to be exploited clinically, we developed a risk model (5) (Fig. 2D) (Table  
143 S2), identifying four RNAs to predict the overall survival of patients with UM (signature S4:  
144 Fig. 2D-E & S8). This ability of the S4 signature to predict survival was confirmed in an  
145 independent cohort (n=63; GSE22138) (15) (Fig. 2F).

146

#### 147 **Conclusion**

148 Here, we characterized a molecular mechanism explaining the loss of tumor suppressor  
149 activity of miR-16 by RNAs (loss of brake effect), which is associated with metastasis risk and  
150 dismal overall survival in UM (Fig. 2G). Instead of promoting RNA decay of miR-16 targets,  
151 the non-canonical miR-16 activity mediates the expression of pro-tumoral genes such as  
152 *PTP4A3* (acceleration effect) (15).

#### 153 **Discussion**

154 Although the concept of competition between RNAs remains a matter of debate (16) the  
155 factors regulating the balance between miR-16 canonical and non-canonical activity (17) may  
156 represent new vulnerabilities that could be targeted to treat UM, a GPCR & miR-16 disease.

157

158 **ABBREVIATIONS**

159 UM: Uveal melanoma; TCGA : the cancer genome atlas; GPCR : G-protein-coupled receptor;  
160 BES: *BAP1*, *EIF1AX* and *SF3B1*; BAP1: BRCA1 associated protein-1; EIF1AX : Eukaryotic  
161 Translation Initiation Factor 1A X-Linked; SF3B1 : Splicing Factor 3b subunit 1; CLL : chronic  
162 lymphocytic leukemia (CLL); MRE : MicroRNA Recognition Element; CCND1 : Cyclin D1;  
163 CCND3 : Cyclin D3; PYGB : Glycogen phosphorylase B; DROSHA : Drosha ribonuclease III,  
164 PTP4A3 : Protein tyrosine phosphatase type IVA, member 3.

165

166 **ACKNOWLEDGEMENTS**

167 The authors thank the Gene Expression and Oncogenesis team from the CNRS UMR6290, Dr  
168 Pascal Loyer from NuMeCan (INSERM U1241), BIOSIT core facilities of Rennes 1 University  
169 (SFR UMS CNRS 3480 – INSERM 018, especially P. Gripon for the BSL3), the UCA  
170 GenomiX platform of IPMC and the Centre de Ressources Biologiques humaines Santé  
171 (especially C. Pangault) for their help. The authors thank Dr FA Karreth, Dr M. Migault, Pr  
172 MH Stern, Sylvain Martineau and Pr Stéphan Vagner for helpful discussion. Support was  
173 provided by a “Ligue Nationale Contre le Cancer” (LNCC) fellowship and French Ministry of  
174 Research (“Ministère français de l’Enseignement supérieur, de la Recherche et de  
175 l’Innovation”) fellowship (AQ). The authors are grateful to Narry Kim for providing the  
176 HCT116 KO DROSHA and HCT116 WT (Korean Collection for Type Cultures (KCTC)) and  
177 to Didier Decaudin for the MP41 cell line.

178

179 **AUTHOR CONTRIBUTIONS**

180 Conceptualization: AQ & DG.  
181 Methodology: AQ, LB, MA, SA & DG.  
182 Software: AQ, MA, SA, GS & DG.  
183 Formal analysis: AQ, LB, MA, SA, DL & BM.  
184 Investigation: AQ, LB, MA, FC, DL & DG.  
185 Ressources : MA, SA, GS, DD & BM.  
186 Writing-original draft: AQ, LB, FM & DG.  
187 Writing – review & editing : all authors.  
188 Visualization: AQ, LB, MA, SA, GS, BM & DG.  
189 Supervision: DG.  
190 Project Administration: DG & MDG.  
191 Funding: DG & MDG.

192

193

#### 194 **FUNDING**

195 This study received financial support from the following: Ligue Nationale Contre le Cancer  
196 (LNCC) Départements du Grand-Ouest ; Fondation ARC pour la Recherche ; AVIESAN Plan  
197 Cancer, Région Bretagne ; University of Rennes 1 ; CNRS ; Ministère de la Recherche et de  
198 l'Enseignement Supérieur and Rennes Métropole.

199

#### 200 **AVAILABILITY of DATA and MATERIALS**

201 Further information and requests for resources and reagents should be directed to and will be  
202 fulfilled by David Gilot ([david.gilot@univ-rennes1.fr](mailto:david.gilot@univ-rennes1.fr)). All unique/stable reagents generated in  
203 this study are available from the Lead Contact with a completed Materials Transfer Agreement.  
204 mRNAseq and RIPseq data that support the findings of this study have been deposited in the  
205 Gene Expression Omnibus (GEO) under accession code GSE180399  
206 (<https://www.ncbi.nlm.nih.gov/geo/query/acc.cgi?acc=GSE180399>) and ArrayExpress under  
207 accession code E-MTAB-10940 ([https://www.ebi.ac.uk/arrayexpress/experiments/E-MTAB-](https://www.ebi.ac.uk/arrayexpress/experiments/E-MTAB-10940)  
208 [10940](https://www.ebi.ac.uk/arrayexpress/experiments/E-MTAB-10940)).

209

#### 210 **ETHICAL APPROVAL AND CONSENT TO PARTICIPATE**

211 Not applicable.

212

#### 213 **CONSENT for PUBLICATION**

214 Not applicable.

215

#### 216 **DECLARATION OF INTERESTS**

217 None reported.

218

#### 219 **REFERENCES**

- 220 1. Jager MJ, Shields CL, Cebulla CM, Abdel-Rahman MH, Grossniklaus HE, Stern M-H,  
221 et al. Uveal melanoma. Nat Rev Dis Prim. 2020 Apr;6(1):24.
- 222 2. Robertson AG, Shih J, Yau C, Gibb EA, Oba J, Mungall KL, et al. Integrative Analysis  
223 Identifies Four Molecular and Clinical Subsets in Uveal Melanoma. Cancer Cell  
224 [Internet]. 2017 Aug 14 [cited 2019 May 2];32(2):204-220.e15. Available from:  
225 <http://www.ncbi.nlm.nih.gov/pubmed/28810145>

- 226 3. Pandiani C, Strub T, Nottet N, Cheli Y, Gambi G, Bille K, et al. Single-cell RNA  
227 sequencing reveals intratumoral heterogeneity in primary uveal melanomas and  
228 identifies HES6 as a driver of the metastatic disease. *Cell Death Differ* [Internet]. 2021  
229 Jun [cited 2021 Aug 20];28(6):1990–2000. Available from:  
230 <http://www.ncbi.nlm.nih.gov/pubmed/33462406>
- 231 4. Harbour JW, Chen R. The DecisionDx-UM Gene Expression Profile Test Provides  
232 Risk Stratification and Individualized Patient Care in Uveal Melanoma. *PLoS Curr*  
233 [Internet]. 2013 Apr 9 [cited 2021 Feb 18];5. Available from:  
234 <http://www.ncbi.nlm.nih.gov/pubmed/23591547>
- 235 5. Luo H, Ma C, Shao J, Cao J. Prognostic Implications of Novel Ten-Gene Signature in  
236 Uveal Melanoma. *Front Oncol* [Internet]. 2020 [cited 2021 Feb 18];10:567512.  
237 Available from: <http://www.ncbi.nlm.nih.gov/pubmed/33194647>
- 238 6. Calin GA, Cimmino A, Fabbri M, Ferracin M, Wojcik SE, Shimizu M, et al. MiR-15a  
239 and miR-16-1 cluster functions in human leukemia. *Proc Natl Acad Sci* [Internet]. 2008  
240 Apr 1 [cited 2017 Apr 26];105(13):5166–71. Available from:  
241 <http://www.ncbi.nlm.nih.gov/pubmed/18362358>
- 242 7. Aqeilan RI, Calin GA, Croce CM. MiR-15a and miR-16-1 in cancer: Discovery,  
243 function and future perspectives. Vol. 17, *Cell Death and Differentiation*. *Cell Death*  
244 *Differ*; 2010. p. 215–20.
- 245 8. Gilot D, Migault M, Bachelot L, Journé F, Rogiers A, Donnou-Fournet E, et al. A non-  
246 coding function of TYRP1 mRNA promotes melanoma growth. *Nat Cell Biol*.  
247 2017;19(11):1348–57.
- 248 9. Karreth FA, Pandolfi PP. CeRNA cross-talk in cancer: When ce-bling rivalries go  
249 awry. *Cancer Discov*. 2013;3(10):1113–21.
- 250 10. Migault M, Donnou-Fournet E, Galibert MD, Gilot D. Definition and identification of  
251 small RNA sponges: Focus on miRNA sequestration. Vol. 117, *Methods*. 2017. p. 35–  
252 47.
- 253 11. Thomson DW, Dinger ME. Endogenous microRNA sponges: evidence and  
254 controversy. *Nat Rev Genet* [Internet]. 2016;17(5):272–83. Available from:  
255 <http://www.nature.com/doi/10.1038/nrg.2016.20>
- 256 12. Rissland OS, Hong SJ, Bartel DP. MicroRNA Destabilization Enables Dynamic  
257 Regulation of the miR-16 Family in Response to Cell-Cycle Changes. *Mol Cell*  
258 [Internet]. 2011;43(6):993–1004. Available from:  
259 <http://dx.doi.org/10.1016/j.molcel.2011.08.021>



- 260 13. Agarwal V, Bell GW, Nam J-W, Bartel DP. Predicting effective microRNA target sites  
261 in mammalian mRNAs. *Elife* [Internet]. 2015 Aug 12 [cited 2015 Aug 13];4(Aug 12).  
262 Available from:  
263 <http://www.pubmedcentral.nih.gov/articlerender.fcgi?artid=4532895&tool=pmcentrez>  
264 [http://www.pubmedcentral.nih.gov/articlerender.fcgi?artid=4532895&tool=pmcentrez](http://www.pubmedcentral.nih.gov/articlerender.fcgi?artid=4532895&tool=pmcentrez&rendertype=abstract)  
265 14. Kim Y-K, Kim B, Kim VN. Re-evaluation of the roles of DROSHA, Exportin 5, and  
266 DICER in microRNA biogenesis. *Proc Natl Acad Sci U S A* [Internet].  
267 2016;113(13):E1881-1889. Available from:  
268 <http://www.pnas.org/content/113/13/E1881.abstract>  
269 15. Laurent C, Valet F, Planque N, Silveri L, Maacha S, Anezo O, et al. High PTP4A3  
270 phosphatase expression correlates with metastatic risk in uveal melanoma patients.  
271 *Cancer Res* [Internet]. 2011 Feb 1 [cited 2021 Sep 6];71(3):666–74. Available from:  
272 <http://www.ncbi.nlm.nih.gov/pubmed/21135111>  
273 16. Smillie CL, Sirey T, Ponting CP. Complexities of post-transcriptional regulation and  
274 the modeling of ceRNA crosstalk. *Crit Rev Biochem Mol Biol* [Internet]. 2018 [cited  
275 2021 Oct 10];53(3):231–45. Available from:  
276 <http://www.ncbi.nlm.nih.gov/pubmed/29569941>  
277 17. Dragomir MP, Knutsen E, Calin GA. SnapShot: Unconventional miRNA Functions.  
278 *Cell* [Internet]. 2018 Aug 9 [cited 2018 Nov 20];174(4):1038-1038.e1. Available from:  
279 <http://www.ncbi.nlm.nih.gov/pubmed/30096304>  
280  
281

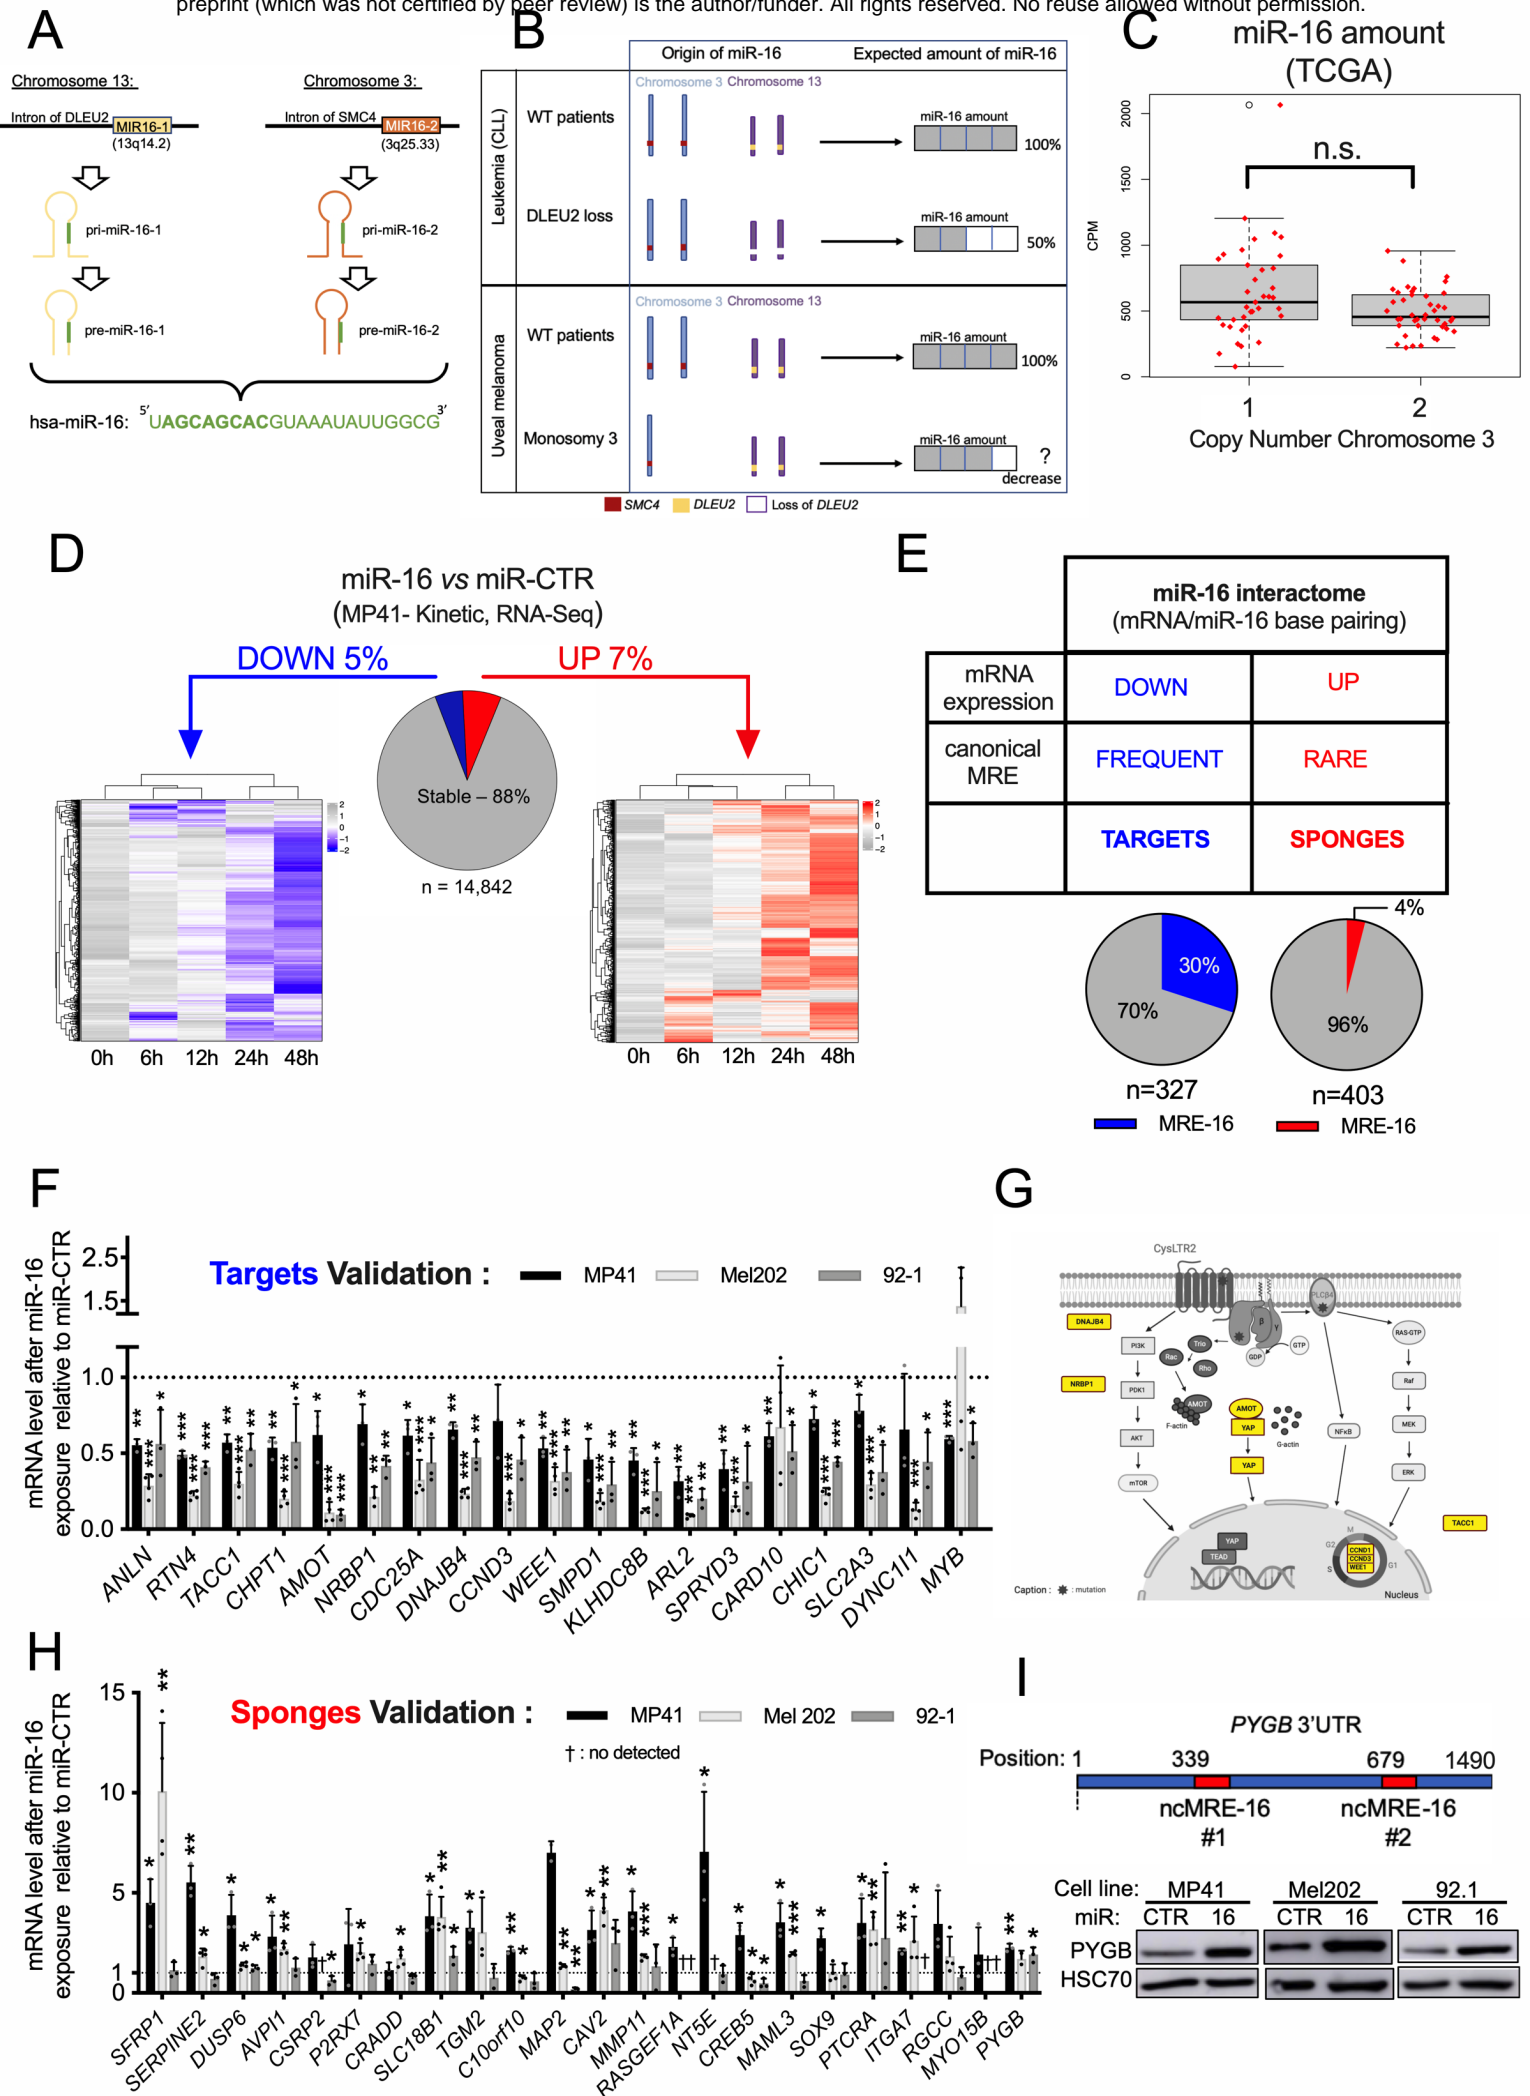

Figure 1: Dual role for miR-16 in uveal melanoma

282 **Figure 1 : Dual role for miR-16 in uveal melanoma**

283 **A-** Schematic representation of the genomic loci of miR-16 (MIR16-1 & MIR16-2) and miR-  
284 16 precursors: pri- & pre-miR-16 (1 & 2) and miR-16. The bolt region on the sequence of miR-  
285 16 sequence corresponds to the seed region of the miRNA.

286 **B-** Schematic representation of the expected amount of miR-16 according to the chromosomal  
287 status for the two miR-16 loci, for both leukemia and uveal melanoma patients; (CLL: Chronic  
288 Lymphocytic Leukemia).

289 **C-** Boxplots of miR-16 expression according to the status of the chromosome 3 for uveal  
290 melanoma patients from the TCGA cohort (expressed in counts per million) - monosomy n=  
291 37 and disomy n=42. Each histogram represents the mean  $\pm$  s.d. n.s. : non significant.

292 **D-** Heatmap representing the differential transcriptomic response induced by transfection of  
293 miR-16 *versus* miR-CTR in MP41 cell line (0h= starting time point, 6h, 12h, 24h, 48h post  
294 transfection). MP41 transcriptome (n=14,842 genes) are divided in three populations. By  
295 comparing miR-16 condition *versus* miR-CTR at early time point (6h-12h) and late time (24h-  
296 48h) three populations have been identified: stable genes ~88%, downregulated (LogFC<-0,5)  
297 genes ~5% and upregulated (LogFC>0,5) genes ~7%. Left heatmap illustrating the down-  
298 regulated RNAs in response to miR-16 transfection in MP41 (0h, 6h, 12h, 24h, 48h). Right  
299 heatmap illustrating the up-regulated RNAs (Table S1).

300 **E-** Table describing the expected miR-16 interactome (mRNAs interacting with miR-16) in  
301 function of the experimental workflow detailed in Fig. S3A. In function of their expression  
302 levels (in response to synthetic miR-16), these miR-16 interacting mRNA have been considered  
303 as targets or sponges. MRE for miRNA responsive element. Pie charts indicate the percentage  
304 of mRNAs (targets or sponges) harbouring at least one MRE-16 have (predicted by  
305 TargetScan 7.2) (13).

306 **F-** mRNA expression levels of selected miR-16 targets, 72h after transfection of miR-16  
307 relative to miR-CTR in MP41, Mel202 and 92-1 cells. n=3, 4, 3 biologically independent  
308 experiments, respectively. Each histogram represents the mean  $\pm$  s.d.; Bilateral Student test  
309 (with non-equivalent variances) \*p<0,05; \*\*p<0,01; \*\*\*p<0,001.

310 **G-** Scheme summarized the most frequent genetic alterations found in uveal melanoma and the  
311 potential roles of several miR-16 targets in these deregulated pathways (Created with  
312 BioRender.com).

313 **H-** mRNA expression levels of selected miR-16 sponges, 72h after transfection of synthetic  
314 miR-16 relative to miR-CTR in MP41, Mel202 and 92-1 cells. n=3, 4, 3 biologically  
315 independent experiments respectively. Each histogram represents the mean  $\pm$  s.d.; Bilateral

316 Student test (with non-equivalent variances) \* $p < 0,05$ ; \*\* $p < 0;01$ ; \*\*\* $p < 0,001$ ; †: Not detected  
317 genes.

318 **I-** Schematic representation of the 3'UTR of *PYGB* mRNA containing two non-canonical  
319 MREs predicted by RNAHybrid (upper panel). Protein expression levels of PYGB in MP41,  
320 Mel202 and 92-1 cell lines in response to miRNA transfection (72h, miR-CTR *versus* miR-16).  
321 The picture is representative of n=3, 2, 3 biologically independent experiments, respectively.  
322

A

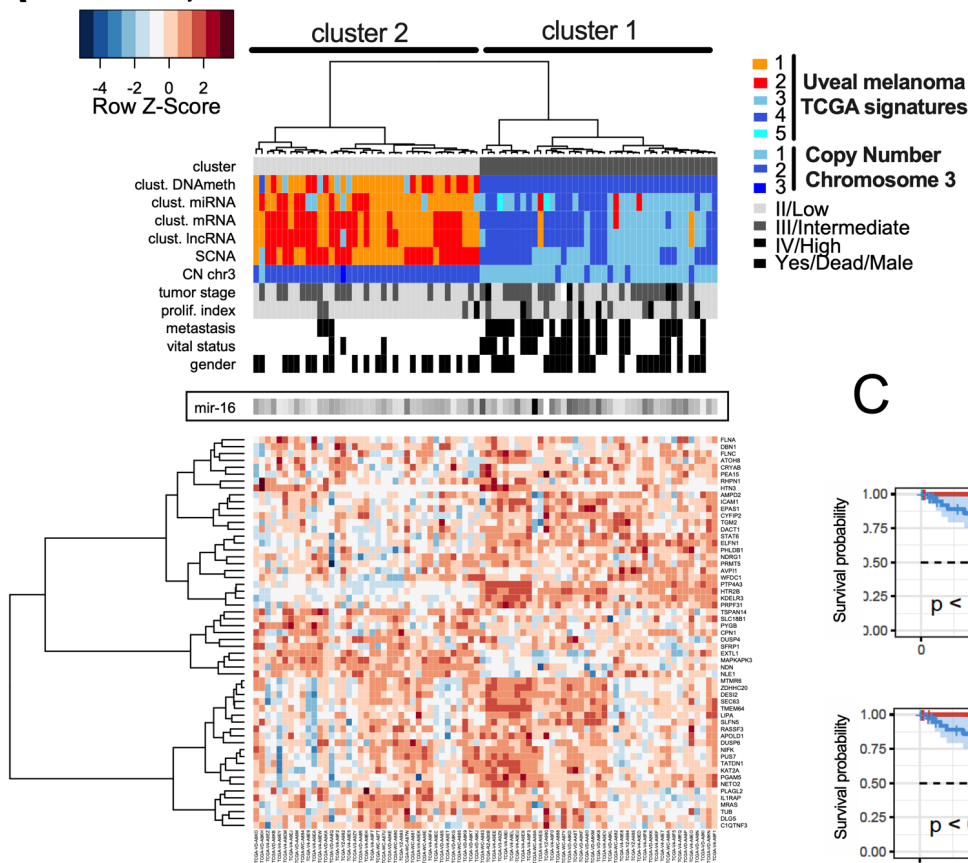

B

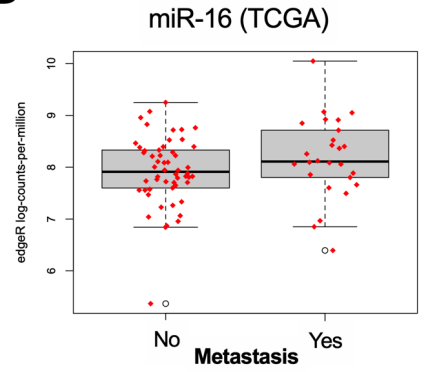

C

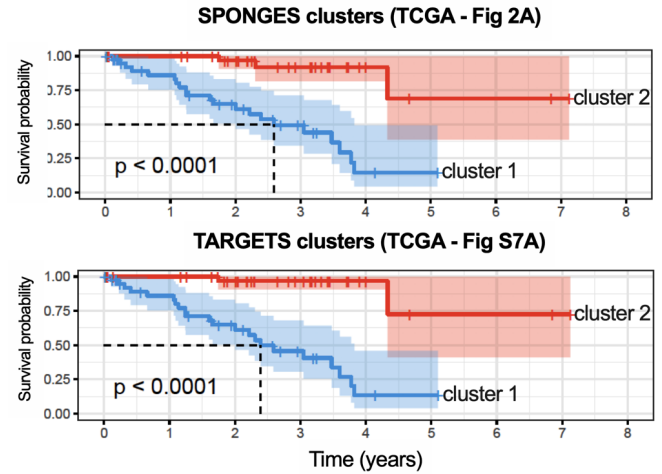

D

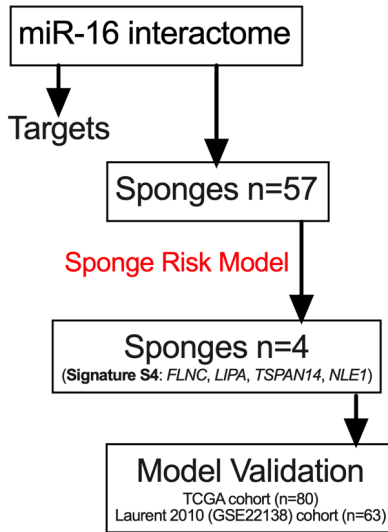

E

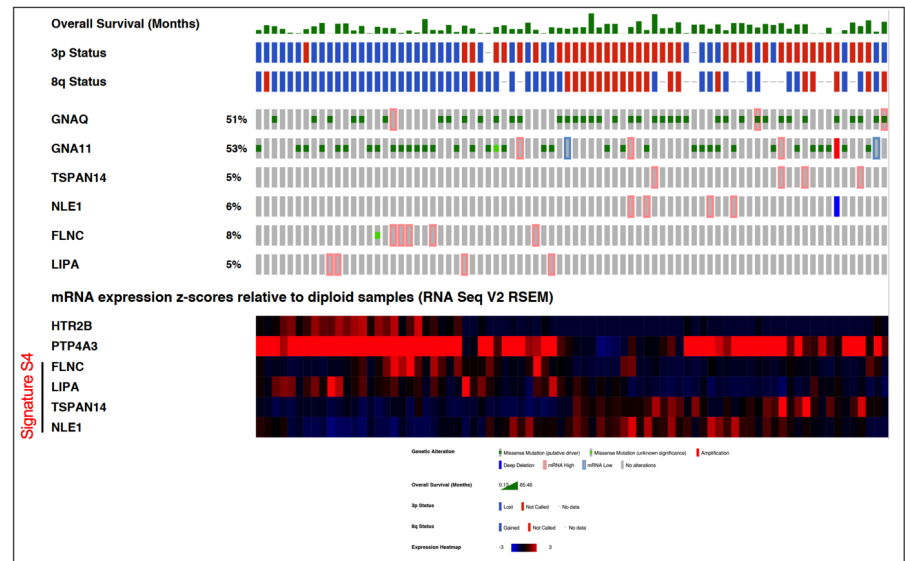

F

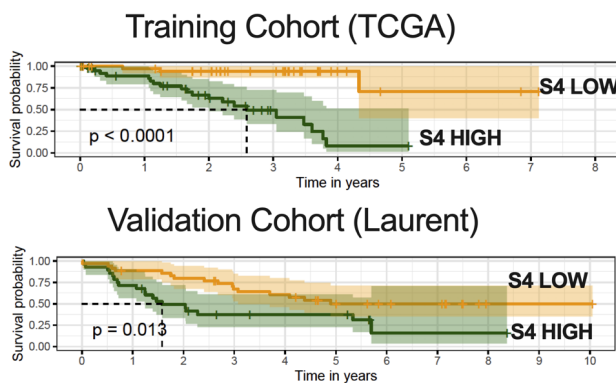

G

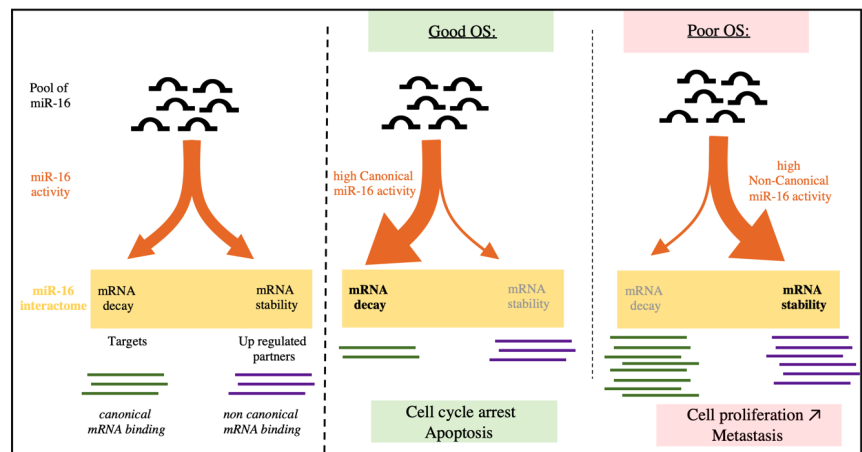

Figure 2: miR-16 availability defines two signatures predicting the prognostic of uveal melanoma patients

323 **Figure 2: miR-16 availability defines two signatures predicting the prognostic of uveal**  
324 **melanoma patients**

325 **A-** Heatmap depicting the expression levels of 57 sponge RNAs - TCGA cohort of uveal  
326 melanoma. Unsupervised gene expression analyses identified 2 clusters: light and dark grey  
327 (clusters 2 & 1, respectively). Cluster 1 is associated with poor clinical outcome (chromosome  
328 3 monosomy, metastasis, ...). Moreover, cluster 1 overlaps with the TCGA signatures (miRNA,  
329 mRNA, lncRNA & DNA methylation) previously associated with poor clinical outcome.

330 **B-** Boxplot representing the amount of miR-16 in function of the metastasis status (TCGA  
331 cohort). No significant difference was found.

332 **C-** Determination of overall survival curves by Kaplan–Meier analysis based on clusters 1 & 2  
333 The difference in survival between groups is reported (log-rank test p-value). KM analyses have  
334 been performed for miR-16 sponges RNA and targets RNA according to the clusters 1 & 2  
335 defined in Fig. 2A and S7A (Table S1).

336 **D-** The Sponges risk model workflow identifying 4 sponges RNAs (the signature S4). The  
337 TCGA-UVM cohort has been used as a training cohort and the GEO dataset GSE22138 as a  
338 validation cohort. We trained an optimal multi-gene survival model based on the expression of  
339 the sponges in the training cohort by selecting survival-associated genes with the *rbSurv* R  
340 package using 1,000 iterations. Briefly, this package allows a sequential selection of genes  
341 based on the Cox proportional hazard model and on maximization of log-likelihood (see  
342 Methods and Table S2). Risk scores were determined using classical Cox model risk formulae  
343 with a linear combination of the gene expression values weighted by the estimated regression  
344 coefficients. The risk cutoff was set to the median of the linear predictor. The Kaplan–Meier  
345 method was used to estimate the survival distributions. Log-rank tests were used to test the  
346 difference between survival groups. Analyses were carried out with the *survival* and  
347 *survivalROC* R packages.

348 **E-** Genetic alterations described in the TCGA cohort of uveal melanoma from Cbioportal for  
349 our 4 sponges (*TSPAN14*, *NLE1*, *FLNC* & *LIPA*). *GNAQ* & *GNAI1* were used as controls  
350 (upper panel). mRNA expression (z-scores, lower panel) of the 4 sponges has been compared  
351 to two mRNA highly expressed in patients with a poor clinical outcome (*HTR2B* & *PTP4A3*).  
352 The complementarity of the 4 sponges efficiently discriminates the overall survival of the  
353 patients (TCGA cohort).

354 **F-** Determination of the overall survival curves by Kaplan–Meier analysis based on the sponge  
355 risk model in two cohorts (signature S4). The risk cutoff (low/high) was set to the median of  
356 the linear predictor.

357 **G-** Hypothetical molecular mechanism explaining the loss of tumor suppressor activity of miR-  
358 16 by RNAs (loss of brake effect). miR-16 is considered as a potent tumor suppressor because  
359 it regulates the cell cycle by decreasing the expression level of targets such as *CCND3* and  
360 *WEE1*. In patient with a poor OS, miR-16 is not able to bind and regulate these RNAs. The  
361 sequestration of miR-16 on other mRNAs (defined as sponges) is associated with metastasis  
362 risk and dismal overall survival in UM. Instead of promoting RNA decay of miR-16 targets,  
363 the non-canonical miR-16 activity promotes expression of sponges such as the pro-tumoral  
364 *PTP4A3* gene (acceleration effect). miR-16 sequestration seems to promote cancer burden by  
365 two combined events – “loss of brake and an acceleration”.

366 In conclusion, we propose that miR-16 can exert pro- or anti-tumoral activity in function of its  
367 base-pairing to mRNAs. For clinicians, our signature S4 accurately predicts clinical outcomes  
368 compared with existing classification schemes. Our results expand the current knowledges on  
369 molecular mechanisms promoting uveal melanoma and pave the way to explore new  
370 therapeutic candidates targeting miR-16 activity for a cancer without effective treatment at  
371 metastatic stage.

372

**A**

| Patient | Chromosome 13             |
|---------|---------------------------|
| 1       | t(1:13) + del(13)(q13q21) |
| 2       | del(13)(q14q22)           |
| 3       | del13q                    |
| 4       | Normal                    |
| 5       | Normal                    |

**B**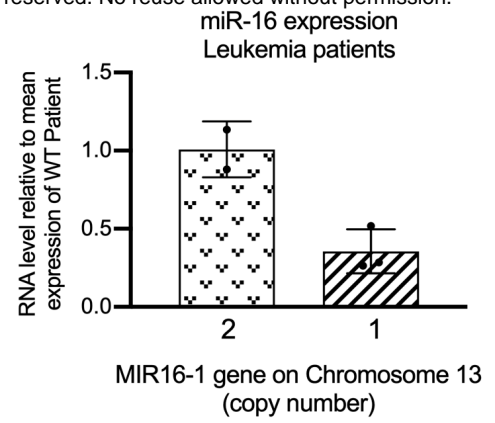

Figure S1: Loss of MIR16-1 gene decreases miR-16 expression in patients with leukemia



373 **Figure S1: loss of MIR16-1 gene decreases miR-16 expression in patients with leukemia**

374 **A-** Table of cytogenetic features of the chromosome 13 in patients analysed in S1B; del:  
375 deletion (n=3); normal (n=2).

376 **B-** miR-16 expression in 5 leukemia patients with or without deletions on chromosome 13.

377 Each histogram represents the mean  $\pm$  s.d.

378

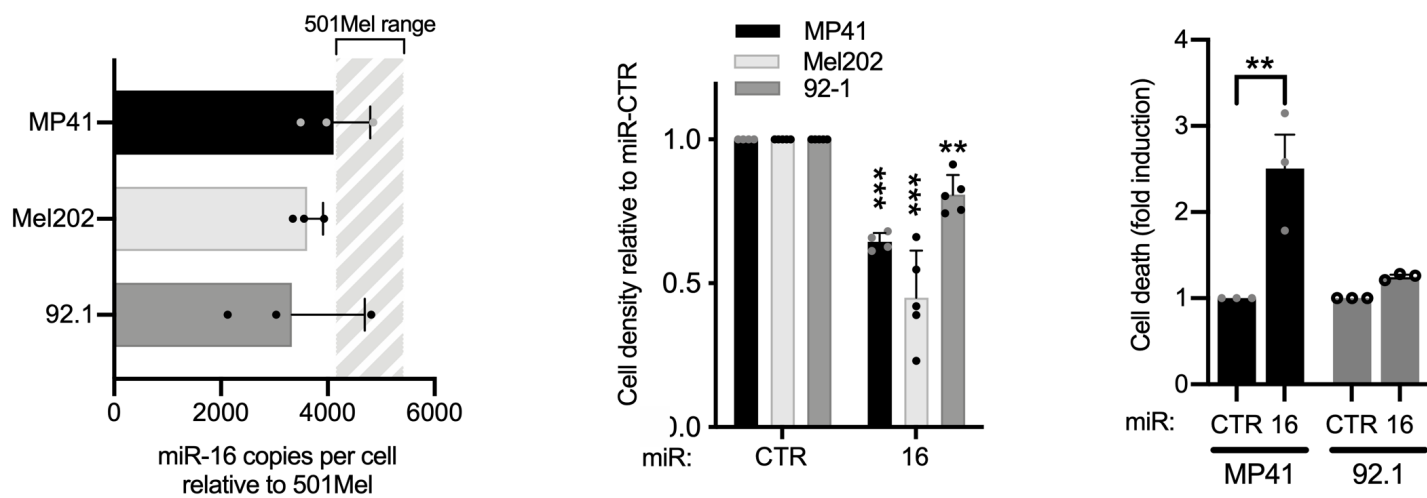

Figure S2: miR-16 expression levels and effects in uveal melanoma cell lines

379 **Figure S2: miR-16 expression levels and effects in uveal melanoma cell lines**

380 **A-** Quantification of miR-16 expression in three uveal melanoma cell line (MP41, Mel202, 92-  
381 1) by RT-qPCR. Levels were compared to values previously quantified in cutaneous melanoma  
382 cell line (501Mel). The absolute quantification (copy number) of miR-16 in 501Mel was  
383 determined by Northern-blot (1). n= 3 biologically independent experiments for each cell line.  
384 Each histogram represents the mean  $\pm$  s.d.

385 **B-** Cell density of MP41, Mel202 and 92-1 in response to miR-16 overexpression (transfection  
386 of synthetic miR-16 *versus* miR-CTR), 72h after transfection. n=4, 5 and 5 biologically  
387 independent experiments, respectively. Each histogram represents the mean  $\pm$  s.d.; Bilateral  
388 Student test (with non-equivalent variances) \*\*p<0,01; \*\*\*p<0,001.

389 **C-** Fold induction of dead cells (apoptosis + necrosis; in % relative to miRNA control) in  
390 response to the miR-16 overexpression in MP41 and 92.1 cells, 72h after transfection. n=3  
391 biologically independent experiments. Each histogram represents the mean  $\pm$  s.d.; Bilateral  
392 Student test (with non-equivalent variances) \*\*p<0,01.

393

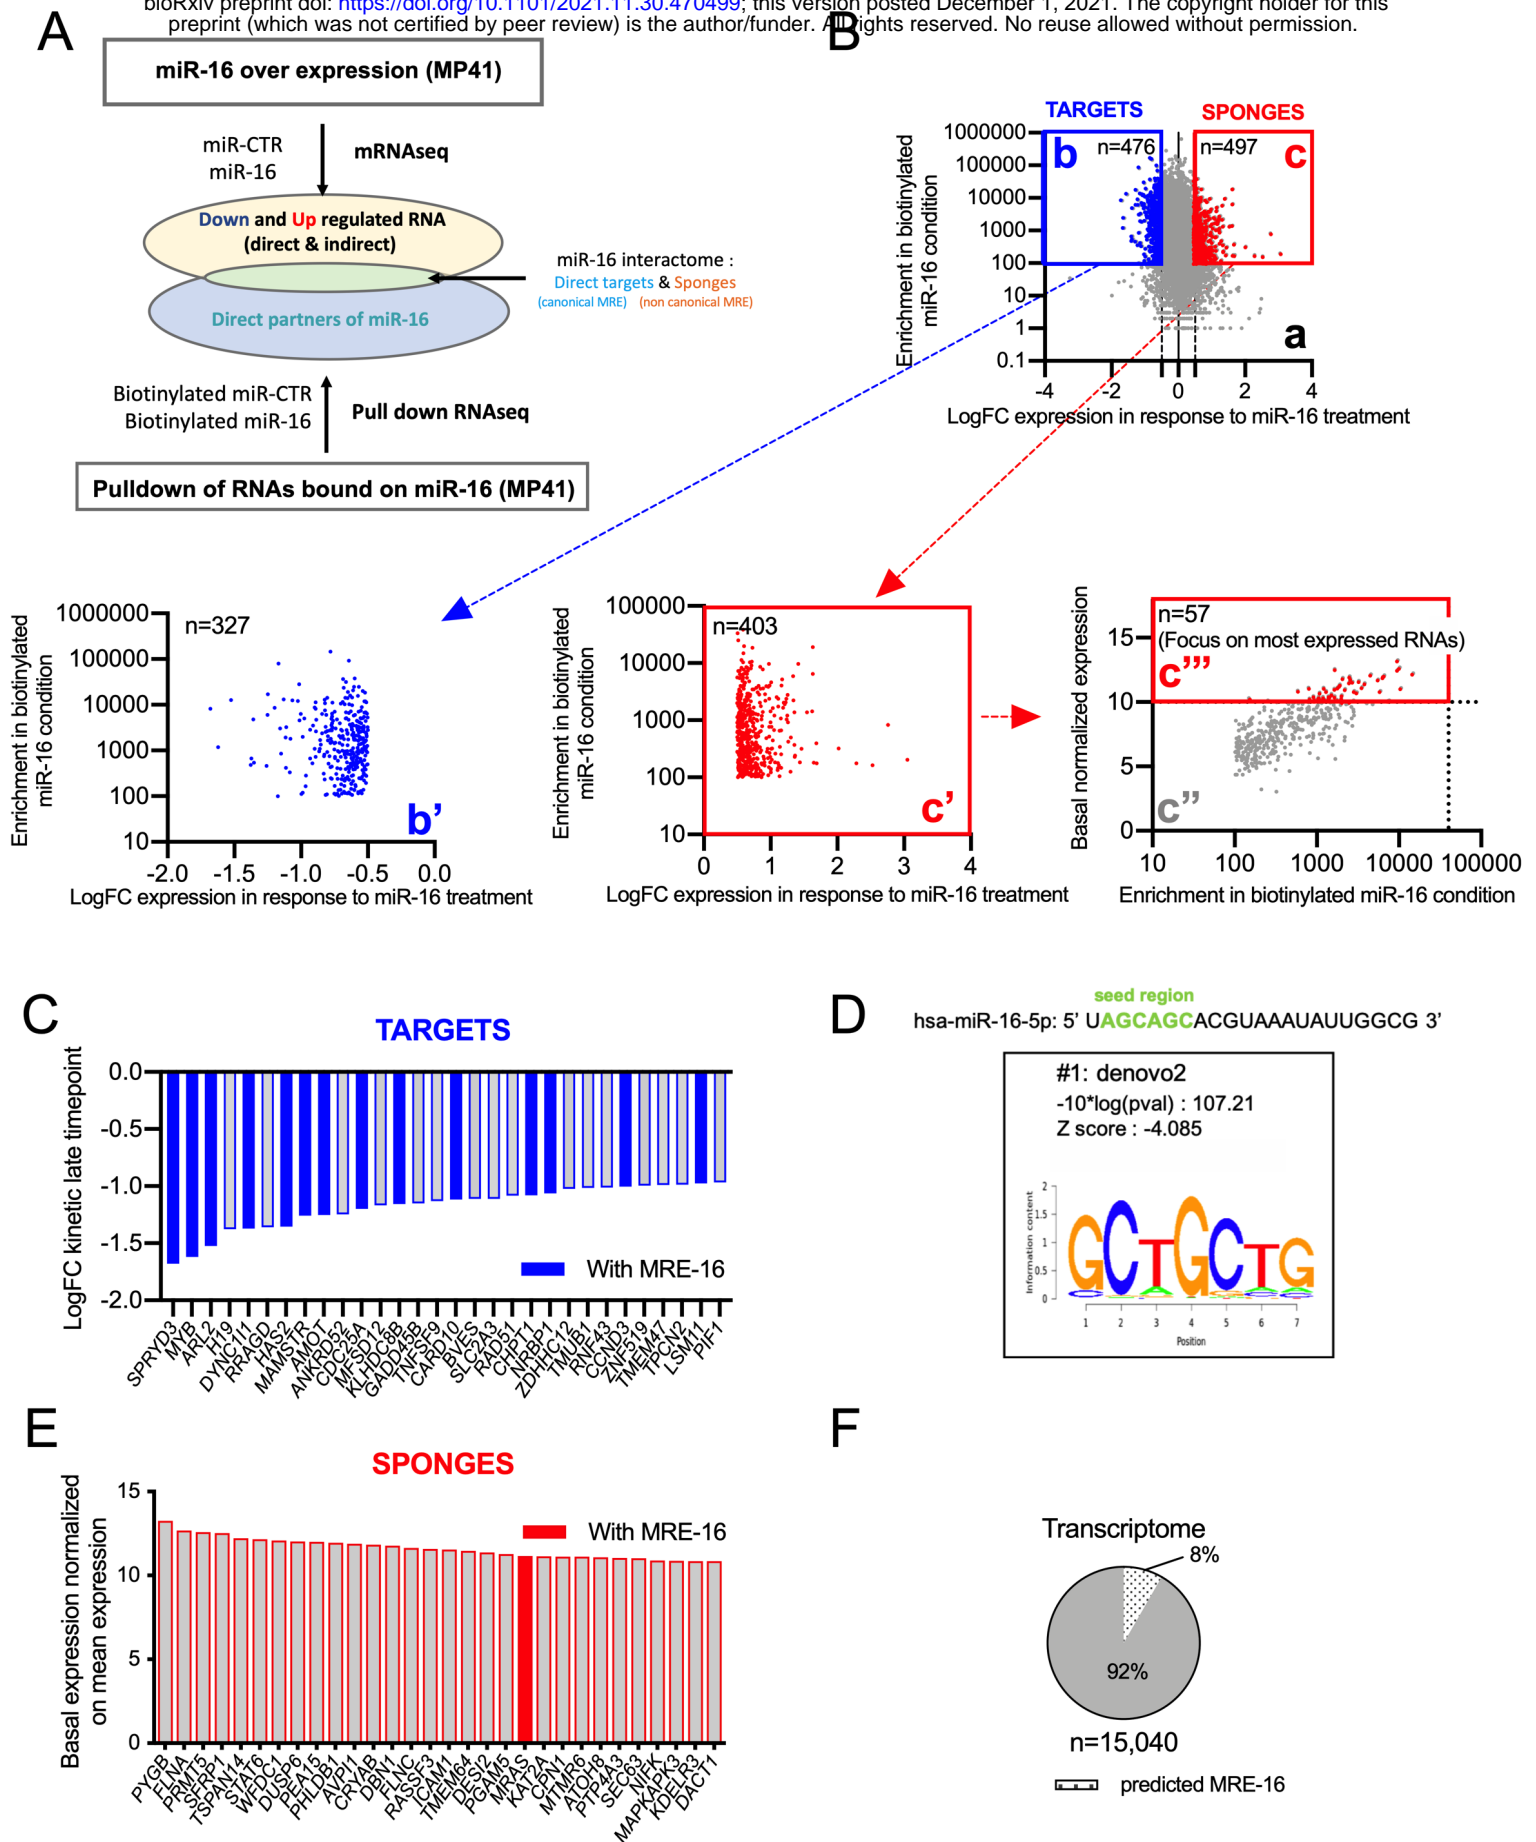

Figure S3: Workflow to uncover miR-16 interactome (targets and sponges)

394 **Figure S3: Workflow to uncover miR-16 interactome (targets and sponges)**

395 **A-** Schematic representation of the workflow. The kinetic experiment identified 2 RNA  
396 populations: downregulated and upregulated RNAs. miR-16 interacting mRNAs have been  
397 purified and sequenced using biotinylated miR-16 *versus* biotinylated miR-CTR. This  
398 combination of methods identified down- and up- regulated RNAs (targets & sponges) which  
399 bind to miR-16. These RNAs defines the miR-16 interactome.

400

401 **B- Graph a:** Representation of pulldown enrichment (miR-16 – miR-CTR) in function of the  
402 transcriptomic expression changes (Fold change (FC) expression after miR-16 exposure). Two  
403 clusters are delimited. The cluster b, in blue, corresponds to RNAs with an enrichment >100  
404 and down regulated with a fold change < -0,5 (n=476 genes). The cluster c, in red, corresponds  
405 to RNAs with an enrichment >100 and up regulated with a fold change >0,5 (n=497 genes).

406 **Graph b':** represents same genes of the graph b without those suspected to be false positive due  
407 to their detection with biotinylated miR-CTR (threshold 500 reads in the RNAseq, for miR-  
408 CTR) (n=327 genes).

409 **Graph c':** represents same genes of the graph c without those suspected to be false positive due  
410 to their detection with biotinylated miR-CTR (threshold 500 reads in the RNAseq for miR-  
411 CTR) (n=403 genes).

412 **Graph c'' in grey:** is the same selected genes of the graph c' but they are represented according  
413 to their basal expression by pulldown enrichment (miR-16 – miR-CTR). The c''' cluster  
414 represents only genes with a basal expression >10 (normalized expression). This workflow  
415 identified 57 potential sponges.

416

417 **C-** Downregulated RNAs (miR-16 targets) are ordered according to the level of the  
418 downregulation at the late timepoint. Only the top 30 targets are represented. Blue ones harbor  
419 at least one canonical MRE-16 predicted by TargetScan 7.2.

420 **D-** Logo of miRNA binding site motifs enriched in cluster down regulated RNAs after miRNA  
421 pulldown in MP41 (analyzed by Cistrome SeqPos (2) )

422 **E-** Basal expression of the 30 most expressed genes at the basal level (from the selected genes  
423 represents in the graph c''' (Fig. S3B)). Red ones harbor at least one canonical MRE-16  
424 predicted by TargetScan 7.2.

425 **F-** Pie chart represents the percentage of RNAs harboring at least one MRE-16 predicted by  
426 TargetScan7.2 in the entire MP41 transcriptome, in white (n=15,040)

427

seed region

hsa-miR-16-5p: 5' UAGCAGCACGUAAAUAUUGGCG 3'

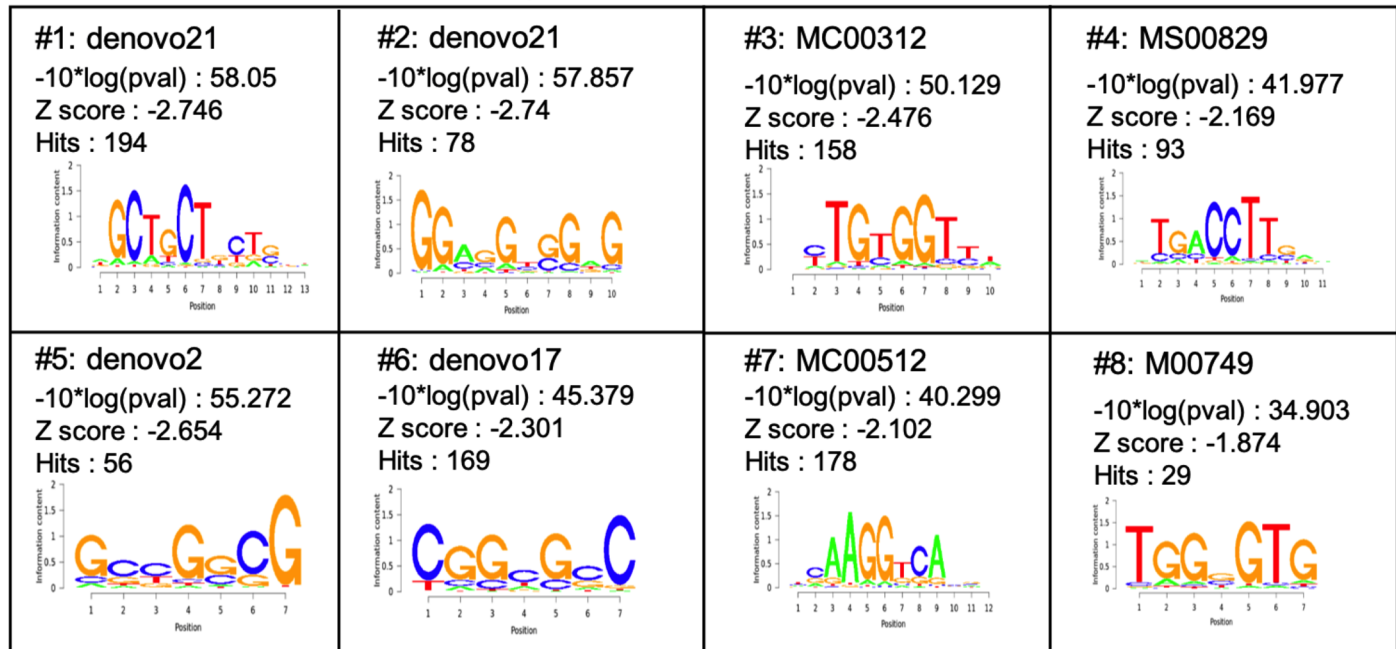

Figure S4 : Putative non-canonical miR-16 binding sites on miR-16 sponges

428 **Figure S4: Putative non-canonical miR-16 binding sites on miR-16 sponges**

429 Logos of miRNA binding site motifs enriched in cluster of upregulated miR-16 interactants

430 after miR-16 pulldown in MP41. Analyses were performed using Cistrome SeqPos.

431

A

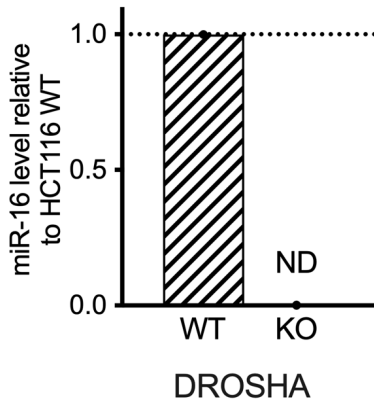

B

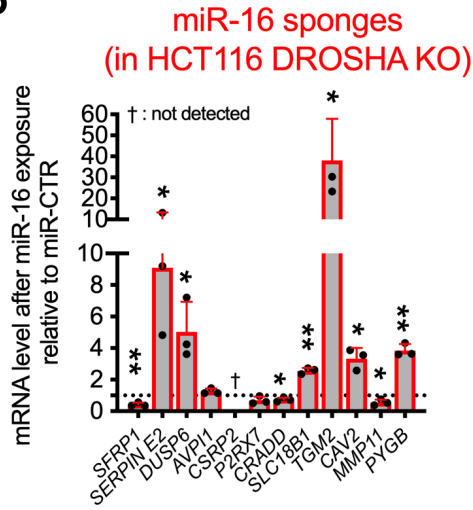

C

|                                  | Motifs                                                                                                                                                                         |                                                                                                                                                                                                | HCT116 KO Drosha cell line |  |  |
|----------------------------------|--------------------------------------------------------------------------------------------------------------------------------------------------------------------------------|------------------------------------------------------------------------------------------------------------------------------------------------------------------------------------------------|----------------------------|--|--|
|                                  | Transfection                                                                                                                                                                   | Transcription                                                                                                                                                                                  | Translation                |  |  |
| WT (canonical MRE) <b>CCND1</b>  | <p>CCND1 WT</p> <p>mfe: -16.1 kcal/mol<br/>p-value: 1.000000e+00</p> <p>position 8<br/>target 5' UUCUGCU<br/>ACGACGA</p> <p>miRNA 3' GCGGUUUAUAAUUC</p>                        |                                                                                                                                                                                                |                            |  |  |
| WT non canonical MRE <b>PYGB</b> | <p>PYGB WT #1</p> <p>mfe: -23.3 kcal/mol<br/>p-value: 1.000000e+00</p> <p>position 8<br/>target 5' A CU CU<br/>GCGGAGUU UUA GUGUG<br/>CGGUUUA AAU CAGCAG</p> <p>miRNA 3' G</p> | <p>PYGB WT #2</p> <p>mfe: -21.0 kcal/mol<br/>p-value: 1.000000e+00</p> <p>position 9<br/>target 5' A G CU U U U 3'<br/>GU GUGU UUGU CUCUGU<br/>CG UUAU GCAC GACGAU</p> <p>miRNA 3' G G AAU</p> |                            |  |  |
| MUT (no binding)                 | <p>WT #1</p> <p>AGCCGATGCTTTAGTGTGA<br/>AAAAGCACACTAATCAACA<br/>MUT #1</p>                                                                                                     | <p>WT #2</p> <p>AGTGGGTGCTTGTGTCTGCTGT<br/>AAAGGCTACTCTATCAACCT<br/>MUT #2</p>                                                                                                                 |                            |  |  |

D

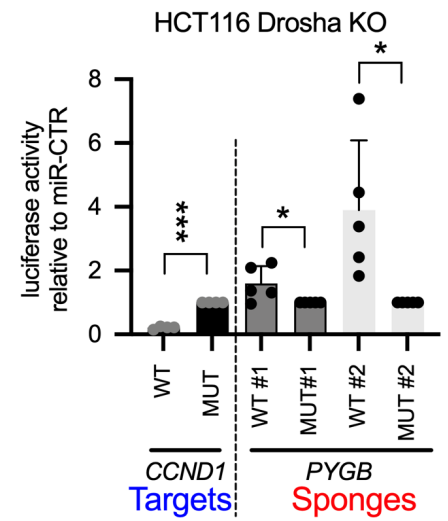

E

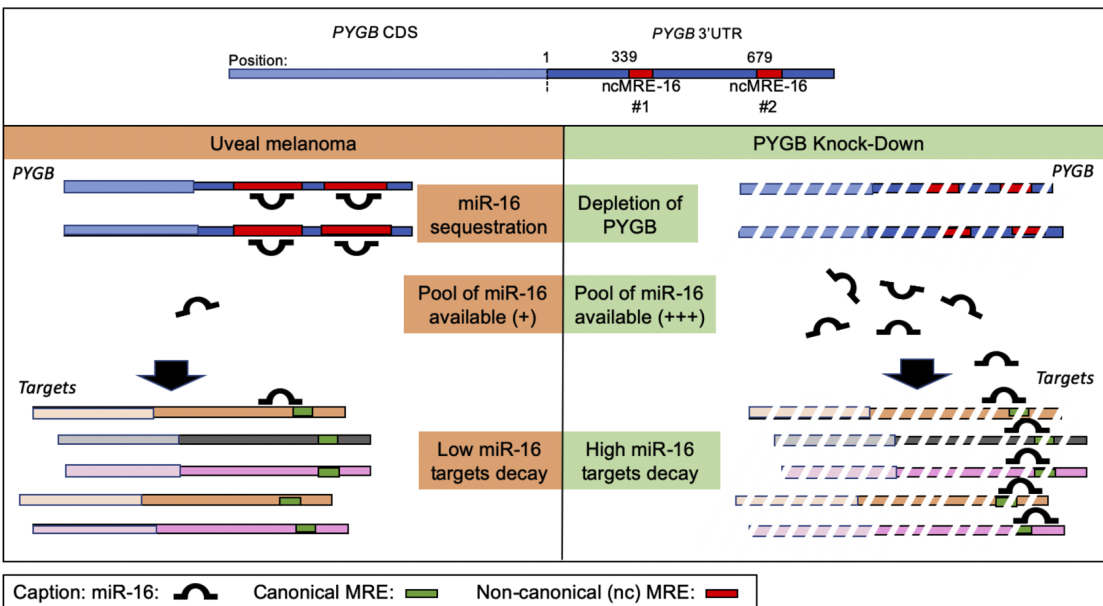

F

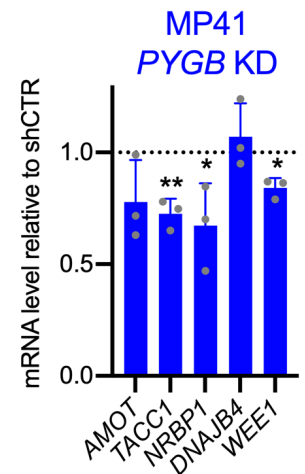

Figure S5: miR-16 is sequestered on non-canonical miR-16 binding sites



432 **Figure S5: miR-16 is sequestered on non-canonical miR-16 binding sites**

433 **A-** Relative expression levels of miR-16 in HCT116 WT and DROSHA KO assessed by RT  
434 qPCR (n=2 biologically independent experiments).

435 **B-** mRNA expression levels of selected miR-16 sponges 72h after transfection of synthetic  
436 miR-16 relative to miR-CTR in HCT116 DROSHA knock-out cells. n=3 biologically  
437 independent experiments Each histogram represents the mean  $\pm$  s.d.; Bilateral Student test (with  
438 non-equivalent variances) \*p<0,05; \*\*p<0;01; †: Not-detected genes.

439 **C-** Biological function of non-canonical MRE-16. On the left side: predicted base-pairing  
440 between *PYGB* mRNA and miR-16 using RNAhybrid (3). Base-pairing has been evaluated for  
441 wild-type (WT) MRE-16 (non-canonical MRE-16 #1 & #2) from *PYGB* mRNA. On the right  
442 side: schematic representation of the luciferase assay. Canonical MRE-16 (from *CCND1*, (4))  
443 has been used as positive control (miR-16 induced the decay of a mRNA harbouring a canonical  
444 MRE-16). The two non-canonical miR-16 binding sites of *PYGB* have been cloned in fusion  
445 with the luciferase coding sequence. The translation efficiency of these chimeric RNAs is  
446 estimated by assessing the luciferase activity.

447 **D-** Luciferase assay assessing the effect of synthetic miR-16 on these chimeric RNAs in  
448 HCT116 KO DROSHA cell line. Canonical MRE-16 (from *CCND1*, (4)) has been used as  
449 positive control (as attended miR-16 induced the decay of a mRNA harbouring a canonical  
450 MRE-16). MUT: mutated; WT: wild type (n= 5 biologically independent experiments). Each  
451 histogram represents the mean  $\pm$  s.d.; Bilateral Student test (with non-equivalent variances)  
452 \*p<0,05.

453 **E-** Hypothetical scheme explaining the miR-16 displacement is response to miR-16 sponge  
454 depletion. Sequestered miR-16 on *PYGB* mRNA are released from *PYGB* and reached other  
455 miR-16 binding sites (on other RNAs including miR-16 targets). Based on our hypothesis, the  
456 expression levels of these targets should thus decrease. *PYGB* mRNA has been selected because  
457 it is the most expressed sponge identified in this study. Here, the stoichiometry between miR-  
458 16 and miR-16-interacting RNAs is preserved (no miR-16 transfection).

459 **F-** mRNA expression levels of miR-16 targets: *AMOT*, *TACCI*, *NRBPI*, *DNAJB4* and *WEE1*  
460 in response to *PYGB* mRNA depletion in MP41 (sh*PYGB* relative to shCTR, (n=3 biologically  
461 independent experiments each) Each histogram represents the mean  $\pm$  s.d.; Bilateral Student  
462 test (with non-equivalent variances) \*p<0,05; \*\*p<0;01.

463  
464  
465

**A**

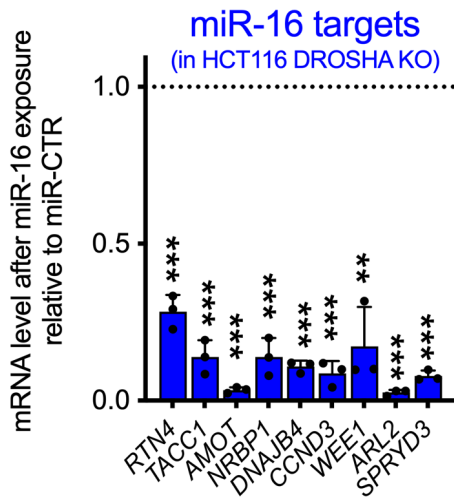

**B**

**Normalized gene expression (MP41)**

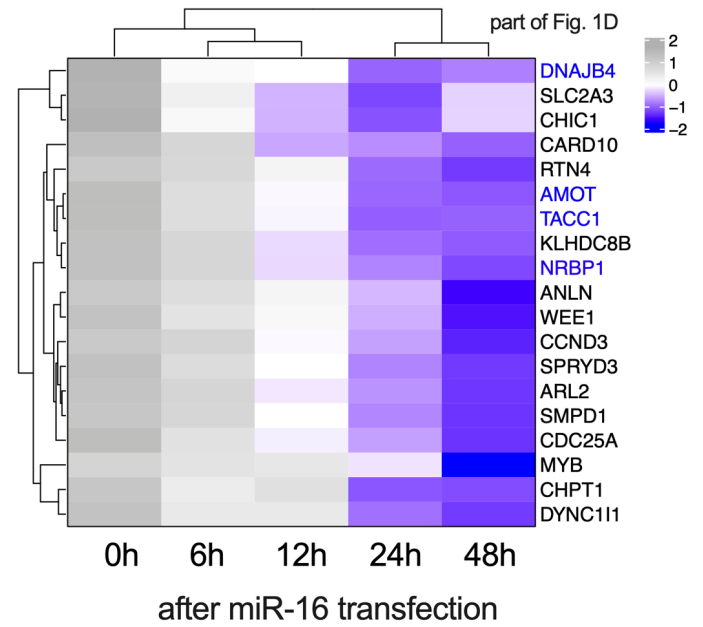

**C**

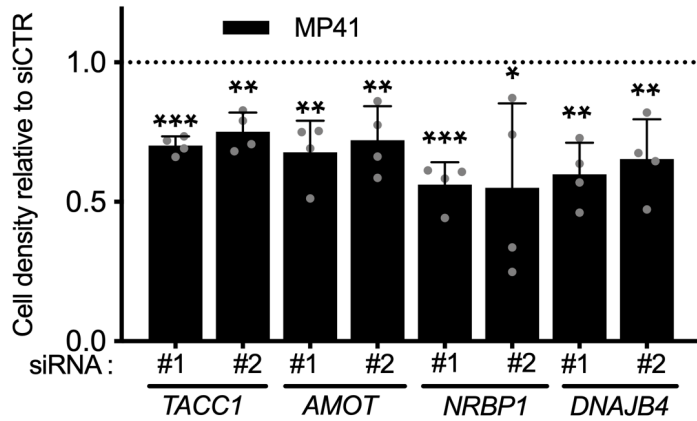

**D**

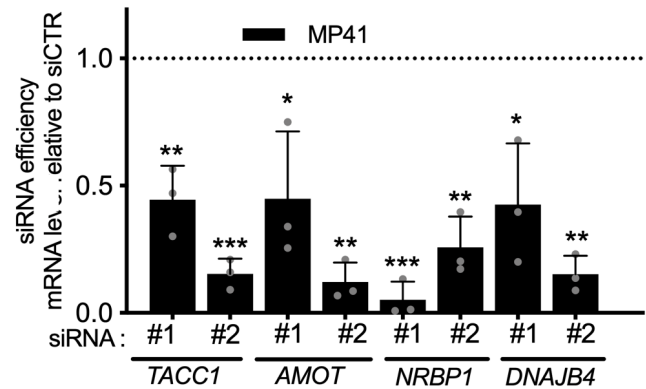

Figure S6: miR-16 modulates cell fate by targeting several RNAs in uveal melanoma

466 **Figure S6: miR-16 modulates cell fate by targeting several RNAs in uveal melanoma**

467 **A-** mRNA expression levels of selected miR-16 targets, 72h after transfection of miR-16 or  
468 miR-CTR in HCT116 DROSHA KO. n=3 biologically independent experiments. Each  
469 histogram represents the mean  $\pm$  s.d.; Bilateral Student test (with non-equivalent variances)  
470 \*\*p<0,01; \*\*\*p<0,001.

471 **B-** part of the Fig. 1D; heatmap illustrating the selected genes of the Fig. 1F, analysed by  
472 RNAseq, after miR-16 transfection in MP41 cells (kinetic : 0h, 6h, 12h, 24h, 48h).

473 **C-** Cell density of MP41 cells in response to the depletion of *TACCI*, *AMOT*, *NRBPI*, *DNAJB4*  
474 by two different siRNAs (#1 and #2) relative to siCTR, (n=4, biologically independent  
475 experiments) 72h after transfection. Each histogram represents the mean  $\pm$  s.d.; Bilateral  
476 Student test (with non-equivalent variances) \*p<0,05; \*\*p<0;01; \*\*\*p<0,001.

477 **D-**Efficiency of siRNA used for Fig. 6C (evaluated by RT-qPCR, 72h post transfection). Two  
478 different siRNA (#1 and #2)/gene. n=3, biologically independent experiments. Expression  
479 relative to siCTR, quantified by RT-qPCR 72h after transfection, \*P<0,05; \*\*P<0;01;  
480 \*\*\*P<0,001

481

A

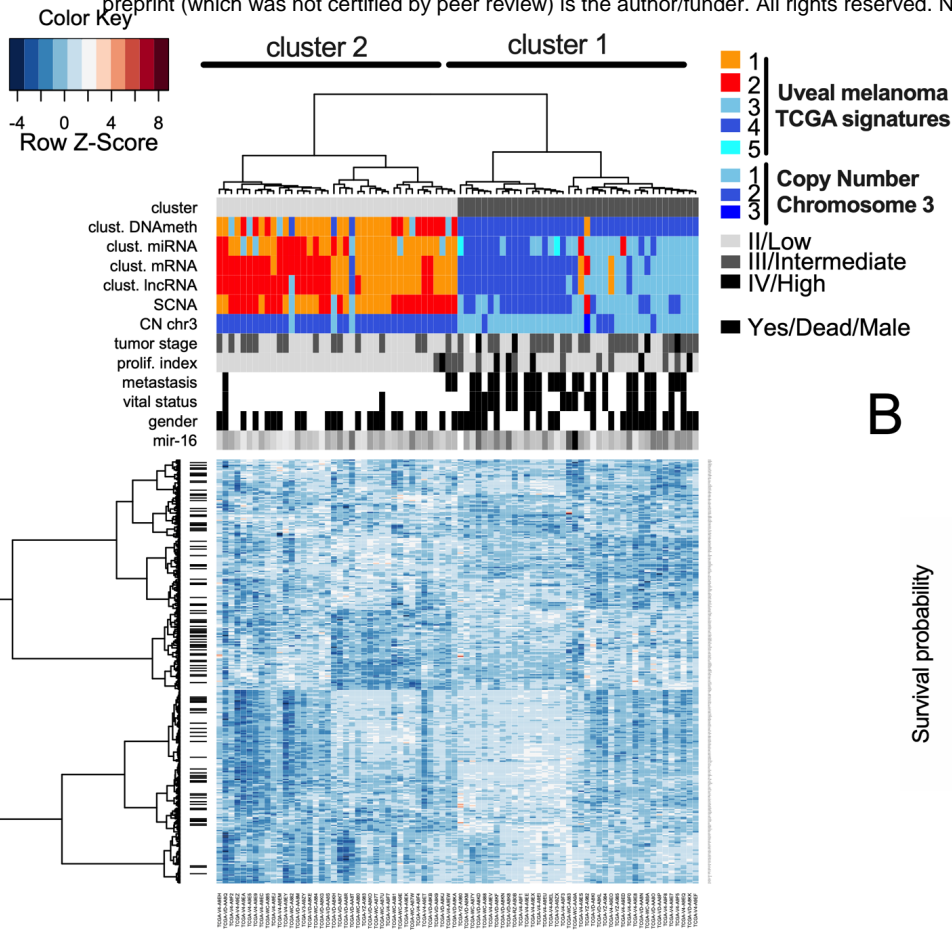

B

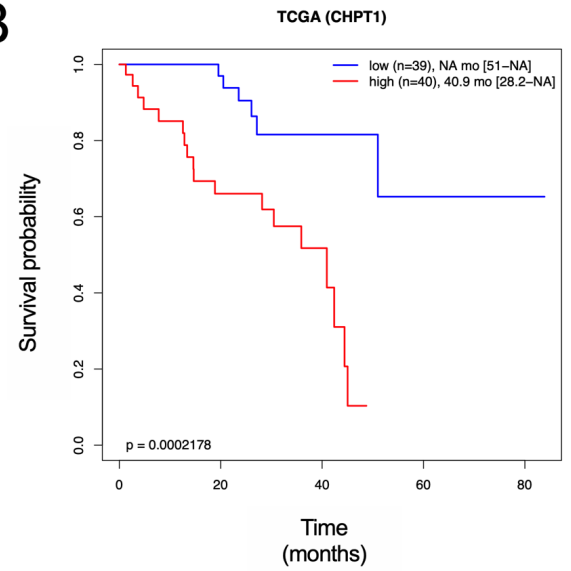

Figure S7: Survival analysis based on miR-16 targets expression

482 **Figure S7: Survival analysis based on miR-16 targets expression**

483 **A-** Heatmap depicting the expression levels of 327 miR-16 targets - TCGA cohort of uveal  
484 melanoma. Unsupervised gene expression analyses identified 2 clusters: light and dark grey  
485 (clusters 2 & 1, respectively). Cluster 1 is associated with poor clinical outcome (chromosome  
486 3 monosomy, metastasis, ...). Moreover, cluster 1 overlaps with the TCGA signatures (miRNA,  
487 mRNA, lncRNA & DNA methylation) also previously associated with poor clinical outcome.

488 **B-** Determination of overall survival curves by Kaplan–Meier analysis based on *CHPT1*  
489 expression (a miR-16 target) in the TCGA cohort (below or above median expression of the  
490 gene). The difference in survival between groups is reported (log-rank test p-value). *CHPT1*  
491 has been selected to illustrate the fact that a high expression level of sponges is associated with  
492 a high level of miR-16 targets as illustrated in Fig. 2G.

493

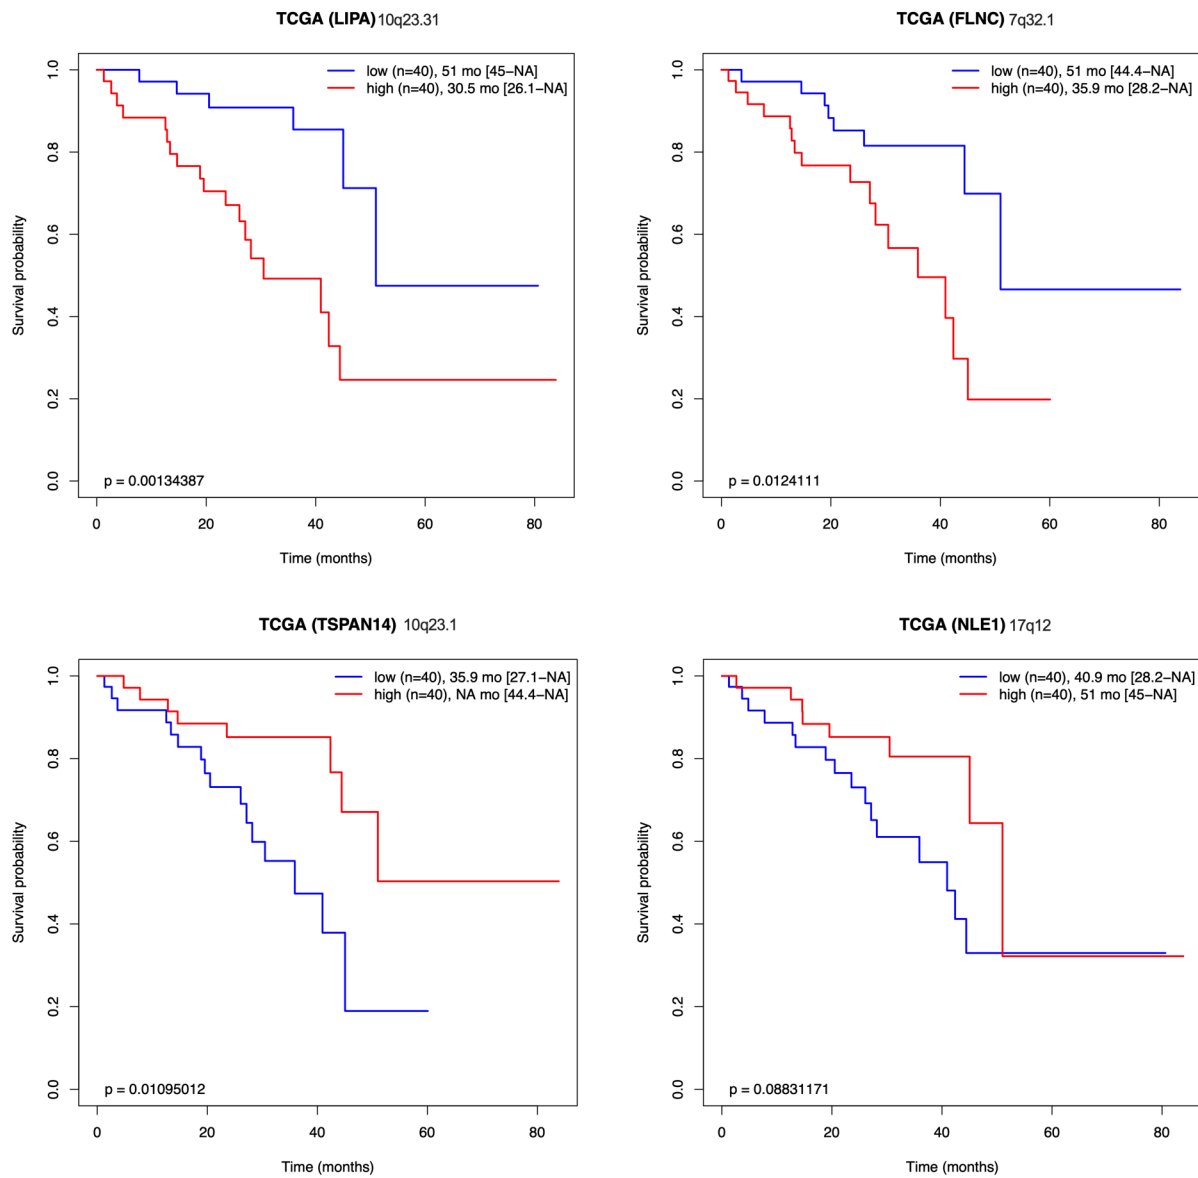

Figure S8: Survival analysis based on Signature 4 genes

494 **Figure S8: Survival analysis based on signature S4 genes**

495 A- Kaplan–Meier analyses for each sponge from the Signature S4 (*LIPA*, *FLNC*, *TSPAN14* &  
496 *NLE1*). Overall survival after subdivision into low (blue) and high (red) expression groups  
497 (below or above median expression of the gene). The size and the median survival of each  
498 group are specified (with 95% CI between brackets). The difference in survival between groups  
499 is also reported (log-rank test p-value). Chromosome position is specified for each sponge.
